# Supplementary material for: UPLC-MS Analysis, Quantification of Compounds, and Comparison of Bioactivity of Methanol Extract and Its Fractions from Qiai (Artemisia argyi Lévl. et Van.)
Source: MDPI journal article supplement (doi:10.3390/molecules28052022), 2023-02-21
Supplement: s1 [file s1]

**Table S1.** The optimized MRM parameters of the fourteen target analytes.

**Table S2.** Antioxidant potential of extract and fractions of QA evaluated by DPPH and ABTS method.

**Table S3.** Inhibition of NO release by LPS-stimulated Raw264.7 cells of extract and fractions of QA

**Table S4.** Diameter of inhibition zone of the extract and fractions of QA

**Figure S1.** Bacterial inhibition of *P. vulgaris* (A), *B.subtilis* (B), *S.aureus* (C), *E.coli* (D), *P.aeruginosa* (E) by samples in Disc diffusion assay.

**Table S1.** The optimized MRM parameters of the fourteen target analytes.

| NO | Analyte                      | RT    | Monitoring ion     | Transitions (amu) | Fragmentor (V) | Collision energy (V) |
|----|------------------------------|-------|--------------------|-------------------|----------------|----------------------|
| 1  | Chlorogenic acid             | 4.99  | [M-H] <sup>-</sup> | 353.10→137.06     | 32             | 44                   |
| 2  | Neochlorogenic acid          | 3.76  | [M-H] <sup>-</sup> | 353.10→191.09     | 44             | 18                   |
| 3  | 4-Dicaffeoylquinic acid      | 5.24  | [M-H] <sup>-</sup> | 353.00→173.08     | 38             | 16                   |
| 4  | 3,5-di-O-caffeoylquinic acid | 9.87  | [M-H] <sup>-</sup> | 515.10→191.09     | 18             | 30                   |
| 5  | 3,4-di-O-caffeoylquinic acid | 9.22  | [M-H] <sup>-</sup> | 515.10→173.08     | 56             | 28                   |
| 6  | 4,5-di-O-caffeoylquinic acid | 11.07 | [M-H] <sup>-</sup> | 515.10→353.12     | 56             | 18                   |
| 7  | Hyperoside                   | 8.25  | [M-H] <sup>-</sup> | 463.03→300.19     | 40             | 24                   |
| 8  | Chrysoeriol 7-O-glucoside    | 11.10 | [M-H] <sup>-</sup> | 461.10→255.08     | 74             | 44                   |
| 9  | Chrysoeriol                  | 13.68 | [M-H] <sup>-</sup> | 299.03→22.13      | 64             | 30                   |
| 10 | Schaftoside                  | 7.18  | [M-H] <sup>-</sup> | 563.10→383.13     | 90             | 32                   |
| 11 | Isoschaftoside               | 7.68  | [M-H] <sup>-</sup> | 563.10→443.07     | 80             | 28                   |
| 12 | Hispidulin                   | 16.16 | [M-H] <sup>-</sup> | 299.03→137.06     | 54             | 30                   |
| 13 | Jaceosidin                   | 16.73 | [M-H] <sup>-</sup> | 329.10→314.10     | 42             | 18                   |
| 14 | Eupatilin                    | 19.31 | [M-H] <sup>-</sup> | 343.10→313.08     | 44             | 26                   |

**Table S2.** Antioxidant potential of extract and fractions of QA evaluated by DPPH and ABTS method.

| Samples | DPPH               | ABTS               |
|---------|--------------------|--------------------|
|         | IC50 value (μg/mL) | IC50 value (μg/mL) |
| QA-TE   | 119.87 ± 1.32      | 543.25 ± 4.87      |
| QA-FPE  | /                  | /                  |
| QA-FEA  | 303.33 ± 3.51      | 601.33 ± 5.19      |
| QA-FWT  | 58.34 ± 0.79       | 270.87 ± 2.36      |
| Trolox  | 11.79 ± 0.27       | 220.06 ± 0.78      |

DPPH, 2,2-dy-phenyl-1-picrylhydrazyl; ABTS, 2,2'-Azino-bis (3-ethylbenzothiazoline-6-sulphonic acid); Trolox, 6-hydroxy-2,5,7,8-tetramethylchroman-2-Carboxylic acid; data are presented as means ± SD, n = 3.

**Table S3.** Inhibition of NO release by LPS-stimulated Raw264.7 cells of extract and fractions of QA

| Samples | Concentrations( $\mu\text{g/ml}$ ) | NO ( $\mu\text{M/L}$ ) | %Inhibition      |
|---------|------------------------------------|------------------------|------------------|
| QA-TE   | 5                                  | 13.08 $\pm$ 0.12       | 1.22 $\pm$ 0.91  |
|         | 10                                 | 11.71 $\pm$ 0.13       | 11.56 $\pm$ 0.95 |
|         | 15                                 | 11.34 $\pm$ 0.08       | 14.35 $\pm$ 0.58 |
|         | 20                                 | 10.64 $\pm$ 0.11       | 19.64 $\pm$ 0.84 |
|         | 25                                 | 8.35 $\pm$ 0.03        | 36.93 $\pm$ 0.20 |
| QA-FPE  | 5                                  | 13.15 $\pm$ 0.05       | 0.68 $\pm$ 0.34  |
|         | 10                                 | 12.97 $\pm$ 0.10       | 2.04 $\pm$ 0.77  |
|         | 15                                 | 12.06 $\pm$ 0.14       | 8.91 $\pm$ 1.08  |
|         | 20                                 | 11.42 $\pm$ 0.09       | 13.75 $\pm$ 0.72 |
|         | 25                                 | 10.10 $\pm$ 0.09       | 23.72 $\pm$ 0.67 |
| QA-FEA  | 5                                  | 9.71 $\pm$ 0.06        | 26.66 $\pm$ 0.42 |
|         | 10                                 | 7.28 $\pm$ 0.05        | 45.02 $\pm$ 0.36 |
|         | 15                                 | 6.36 $\pm$ 0.05        | 51.96 $\pm$ 0.36 |
|         | 20                                 | 5.22 $\pm$ 0.04        | 60.57 $\pm$ 0.31 |
|         | 25                                 | 4.00 $\pm$ 0.10        | 69.79 $\pm$ 0.79 |
| QA-FWT  | 5                                  | 12.13 $\pm$ 0.09       | 8.38 $\pm$ 0.68  |
|         | 10                                 | 10.08 $\pm$ 0.13       | 23.87 $\pm$ 1.02 |
|         | 15                                 | 8.77 $\pm$ 0.19        | 33.76 $\pm$ 1.46 |
|         | 20                                 | 5.93 $\pm$ 0.21        | 55.40 $\pm$ 1.58 |
|         | 25                                 | 5.34 $\pm$ 0.11        | 59.67 $\pm$ 0.83 |

Data are presented as means  $\pm$  SD, n = 4.

**Table S4.** Diameter of inhibition zone of the extract and fractions of QA

| Microorganisms      | QA-TE          | QA-FPE         | QA-FEA         | QA-FWT         | CH             |
|---------------------|----------------|----------------|----------------|----------------|----------------|
| <i>P.vulgaris</i>   | 17.3 $\pm$ 1.2 | 13.7 $\pm$ 0.6 | 16.3 $\pm$ 1.5 | 17.7 $\pm$ 0.6 | 30.3 $\pm$ 1.5 |
| <i>B.subtilis</i>   | 11.7 $\pm$ 0.6 | 10.7 $\pm$ 0.6 | 13.3 $\pm$ 0.6 | 20.3 $\pm$ 2.1 | 33.9 $\pm$ 1.5 |
| <i>S.aureus</i>     | 20.7 $\pm$ 0.6 | 14.0 $\pm$ 1.0 | 18.7 $\pm$ 0.6 | 22.3 $\pm$ 0.6 | 25.7 $\pm$ 0.6 |
| <i>E.coli</i>       | 16.7 $\pm$ 0.6 | 14.7 $\pm$ 0.6 | 16.7 $\pm$ 0.6 | 20.0 $\pm$ 1.0 | 33.7 $\pm$ 1.2 |
| <i>P.aeruginosa</i> | 14.7 $\pm$ 1.5 | 12.7 $\pm$ 0.6 | 15.7 $\pm$ 0.6 | 18.7 $\pm$ 1.2 | 32.3 $\pm$ 1.5 |

Data are presented as means  $\pm$  SD, n = 3.

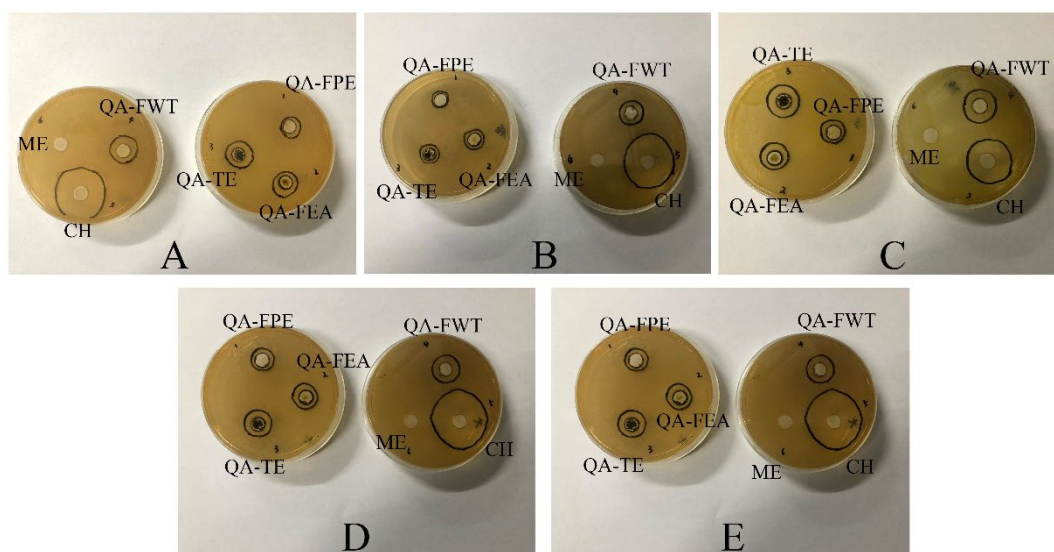

**Figure S1.** Bacterial inhibition of *P. vulgaris* (A), *B. subtilis* (B), *S. aureus* (C), *E. coli* (D), *P. aeruginosa* (E) by samples in Disc diffusion assay.
